# Supplementary material for: Palladacycles of sulfated and selenated Schiff bases of ferrocene-carboxaldehyde as catalysts for O-arylation and Suzuki–Miyaura coupling
Source: Royal Society of Chemistry journal article supplement (doi:10.1039/c7dt00083a), 2017-01-01
Supplement: c7dt00083a1.pdf [file c7dt00083a1.pdf]

**ESI for**

**Palladacycles of sulfated and selenated Schiff bases of ferrocene-carboxaldehyde as catalysts for O-arylation and Suzuki–Miyaura coupling**

Alpesh K. Sharma, Hemant Joshi, Renu Bhaskar, Satyendra Kumar and Ajai K. Singh\*

*Department of Chemistry, Indian Institute of Technology Delhi, New Delhi – 110016, India*

*E-mail: aksingh@chemistry.iitd.ac.in*

**List of content**

1. Table S1 of the crystallographic and refinement data of **1-3**
2. TableS2 of selected bond lengths and bond angles of **1-3**
3. Table S3 of non-covalent interactions C–H···Cl distances (Å) of complexes **1-3**
4. Mass and NMR spectra

**Table S1. Crystal data and structural refinement parameters for 1- 3**

| Compounds                                            | <b>1</b>                                                                                   | <b>2</b>                                                                                       | <b>3</b>                                                                                                 |
|------------------------------------------------------|--------------------------------------------------------------------------------------------|------------------------------------------------------------------------------------------------|----------------------------------------------------------------------------------------------------------|
| Empirical formula                                    | C <sub>19</sub> H <sub>18</sub> ClFeNPd S                                                  | C <sub>19</sub> H <sub>18</sub> ClFeNPdSe                                                      | C <sub>37</sub> H <sub>33</sub> ClFeNPPd S                                                               |
| Formula wt.                                          | 490.10                                                                                     | 537.00                                                                                         | 752.37                                                                                                   |
| Crystal size [mm]                                    | 0.43 × 0.21 × 0.19                                                                         | 0.34×0.25×0.22                                                                                 | 0.35×0.27 ×0.15                                                                                          |
| Crystal system                                       | Monoclinic                                                                                 | Monoclinic                                                                                     | Triclinic                                                                                                |
| Space group                                          | <i>P 21/c</i>                                                                              | <i>P 2(1)/c</i>                                                                                | <i>P -1</i>                                                                                              |
| Unit Cell dimension                                  | a = 9.193(2)<br>b = 11.622(3)<br>c = 17.081(4)<br>α = 90.00<br>β = 101.079(4)<br>γ = 90.00 | a = 9.203(7)<br>b = 11.673(8)<br>c = 17.075(12)<br>α = 90.00°<br>β = 101.083(13)<br>γ = 90.00° | a = 10.0905(14)<br>b = 10.5555(14)<br>c = 18.524(3)<br>α = 100.307(2)<br>β = 93.349(2)<br>γ = 116.254(2) |
| Volume [Å <sup>3</sup> ]                             | 1790.9(7)                                                                                  | 1800(2)                                                                                        | 1719.6(4)                                                                                                |
| Z                                                    | 4                                                                                          | 4                                                                                              | 2                                                                                                        |
| Density (Calc.) [Mg·m <sup>-3</sup> ]                | 1.818                                                                                      | 1.982                                                                                          | 1.453                                                                                                    |
| Absorption coeff. [mm <sup>-1</sup> ]                | 2.079                                                                                      | 3.975                                                                                          | 1.156                                                                                                    |
| <i>F</i> (000)                                       | 976.0                                                                                      | 1048                                                                                           | 764.0                                                                                                    |
| θ range [°]                                          | 2.13 – 24.99                                                                               | 2.85–27.26                                                                                     | 2.21 - 25.00                                                                                             |
| Index ranges                                         | -10 ≤ <i>h</i> ≤ 10<br>-13 ≤ <i>k</i> ≤ 13<br>-20 ≤ <i>l</i> ≤ 20                          | -10 ≤ <i>h</i> ≤ 7<br>-13 ≤ <i>k</i> ≤ 13<br>-18 ≤ <i>l</i> ≤ 18                               | -11 ≤ <i>h</i> ≤ 11<br>-12 ≤ <i>k</i> ≤ 12<br>-22 ≤ <i>l</i> ≤ 22                                        |
| Reflections collected                                | 16747                                                                                      | 7033                                                                                           | 16403                                                                                                    |
| Independent reflections ( <i>R</i> <sub>int.</sub> ) | 3151 ( 0.0489 )                                                                            | 3045 (0.0320)                                                                                  | 6044(0.0245)                                                                                             |
| Max./min. Transmission                               | 0.674 /0.598                                                                               | 0.447 / 0.358                                                                                  | 0.839/0.696                                                                                              |
| Data/restraints/parameters                           | 3151 /0/ 217                                                                               | 3045 /0/217                                                                                    | 6030/0/388                                                                                               |
| Goodness-of-fit on <i>F</i> <sup>2</sup>             | 1.170                                                                                      | 1.058                                                                                          | 1.156                                                                                                    |
| Final R indices [ <i>I</i> > 2σ( <i>I</i> )]         | <i>R</i> <sub>1</sub> = 0.0492<br><i>wR</i> <sub>2</sub> = 0.0859                          | <i>R</i> <sub>1</sub> = 0.0866<br><i>wR</i> <sub>2</sub> = 0.1414                              | <i>R</i> <sub>1</sub> = 0.0725<br><i>wR</i> <sub>2</sub> = 0.2261                                        |
| R indices (all data)                                 | <i>R</i> <sub>1</sub> = 0.0389<br><i>wR</i> <sub>2</sub> = 0.0825                          | <i>R</i> <sub>1</sub> = 0.0477<br><i>wR</i> <sub>2</sub> = 0.0.1328                            | <i>R</i> <sub>1</sub> = 0.0660<br><i>wR</i> <sub>2</sub> = 0.2205                                        |
| Largest diff. peak/hole [e.Å <sup>-3</sup> ]         | 0.632/ -0.419                                                                              | 0.936 /-0.606                                                                                  | 1.450/-0.383                                                                                             |

|    |  |  |  |
|----|--|--|--|
| 3] |  |  |  |
|----|--|--|--|

**Table S2. Selected bond lengths and bond angles of 1- 3**

| Complex   | Bond length [Å] |              | Bond angle [°] |            |
|-----------|-----------------|--------------|----------------|------------|
| <b>1.</b> | Pd1— S1         | 2.4249(12)   | N1— Pd1— Cl1   | 174.00(11) |
|           | N1— Pd1         | 2.012(4)     | C11— Pd1— S1   | 165.62(14) |
|           | Cl1— Pd1        | 2.2870(14)   | C11 —Pd1 —Cl1  | 93.74(15)  |
|           | C11— Pd1        | 1.973(4)     | N1— Pd1— S1    | 84.68(11)  |
|           | C9 —N1          | 1.274(6)     | C11 —Pd1 —N1   | 81.03(18)  |
|           | C6— S1          | 1.785(5)     | C7 —Se1— Pd1   | 93.22(16)  |
|           |                 |              | C9 —N1 —Pd1    | 116.9(3)   |
|           |                 | C8— N1 —Pd1  | 120.0(3)       |            |
| <b>2.</b> | Pd1— Se1        | 2.5058(14)   | N1— Pd1— Cl1   | 174.53(15) |
|           | N1— Pd1         | 2.025(5)     | C11— Pd1— Se1  | 166.61(18) |
|           | Cl1— Pd1        | 2.286(2)     | C11 —Pd1 —Cl1  | 93.8(2)    |
|           | C11— Pd1        | 1.956(6)     | N1— Pd1— Se1   | 85.25(16)  |
|           | C9 —N1          | 1.286(8)     | C11 —Pd1 —N1   | 81.6(2)    |
|           | C6— Se1         | 1.912(6)     | C7 —Se1— Pd1   | 90.6(2)    |
|           |                 |              | C9 —N1 —Pd1    | 115.9(4)   |
|           |                 | C8— N1 —Pd1  | 121.5(4)       |            |
| <b>3</b>  | Pd1— P1         | 2.2445(17)   | N1— Pd1— Cl1   | 92.36(18)  |
|           | N1— Pd1         | 2.131(6)     | C11— Pd1— P1   | 92.00(2)   |
|           | Cl1— Pd1        | 2.370(2)     | C11 —Pd1 —Cl1  | 173.1(2)   |
|           | C11— Pd1        | 2.003(7)     | N1— Pd1— P1    | 172.07(19) |
|           | C9 —N1          | 1.272(10)    | C11 —Pd1 —N1   | 80.90(3)   |
|           | C6— Se1         | 1.775(9)     | C25— P1— Pd1   | 111.90(2)  |
|           |                 |              | C31— P1 —Pd1   | 114.60(2)  |
|           |                 | C37— P1— Pd1 | 17.00(2)       |            |

**Table S3. Non-covalent interactions C—H···Cl distances (Å) of complexes 1- 3**

| Complex 1 |       | Complex 2 |       | Complex 3 |       |
|-----------|-------|-----------|-------|-----------|-------|
| H1-C11    | 2.934 | H1-C11    | 2.888 | C11-H22   | 2.945 |
| H2-C11    | 2.879 | H2-C11    | 2.924 | H9-F6     | 2.612 |
| H14-C11   | 2.744 | H14-C11   | 2.602 |           |       |
| C15-H13   | 2.899 | H7B-H17   | 2.357 |           |       |

## Mass spectra-

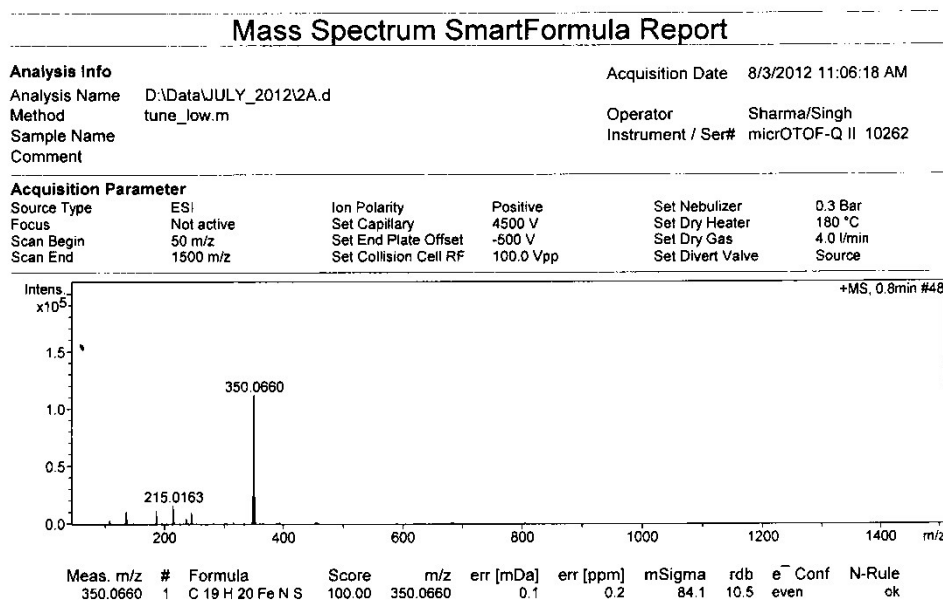

**Fig S1** Mass spectrum of ligand 1

## Mass Spectrum SmartFormula Report

|                      |                        |                   |                      |
|----------------------|------------------------|-------------------|----------------------|
| <b>Analysis Info</b> |                        | Acquisition Date  | 8/3/2012 11:25:39 AM |
| Analysis Name        | D:\Data\JULY_2012\3A.d | Operator          | Sharma/Singh         |
| Method               | tune_low.m             | Instrument / Ser# | micrOTOF-Q II 10262  |
| Sample Name          |                        |                   |                      |
| Comment              |                        |                   |                      |

|                              |            |                       |           |                  |           |
|------------------------------|------------|-----------------------|-----------|------------------|-----------|
| <b>Acquisition Parameter</b> |            |                       |           |                  |           |
| Source Type                  | ESI        | Ion Polarity          | Positive  | Set Nebulizer    | 0.3 Bar   |
| Focus                        | Not active | Set Capillary         | 4500 V    | Set Dry Heater   | 180 °C    |
| Scan Begin                   | 50 m/z     | Set End Plate Offset  | -500 V    | Set Dry Gas      | 4.0 l/min |
| Scan End                     | 1500 m/z   | Set Collision Ce I RF | 100.0 Vpp | Set Divert Valve | Source    |

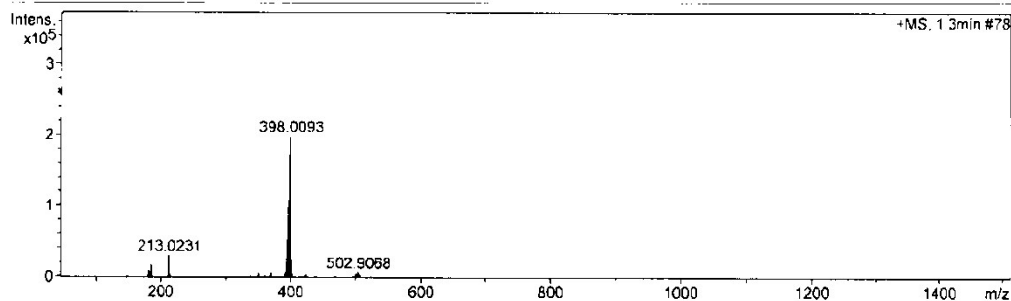

| Meas. m/z | # | Formula           | Score  | m/z      | err [mDa] | err [ppm] | mSigma | rdb  | e <sup>-</sup> Conf | N-Rule |
|-----------|---|-------------------|--------|----------|-----------|-----------|--------|------|---------------------|--------|
| 398.0093  | 1 | C 19 H 20 Fe N Se | 100.00 | 398.0106 | 1.3       | 3.3       | 50.8   | 10.5 | even                | ok     |

**Fig S2** Mass spectrum of ligand 2

## Mass Spectrum SmartFormula Report

|                      |                        |                   |                      |
|----------------------|------------------------|-------------------|----------------------|
| <b>Analysis Info</b> |                        | Acquisition Date  | 8/3/2012 12:15:59 PM |
| Analysis Name        | D:\Data\JULY_2012\5A.d | Operator          | Sharma/Singh         |
| Method               | tune_low.m             | Instrument / Ser# | micrOTOF-Q II 10262  |
| Sample Name          |                        |                   |                      |
| Comment              |                        |                   |                      |

|                              |            |                       |           |                  |           |
|------------------------------|------------|-----------------------|-----------|------------------|-----------|
| <b>Acquisition Parameter</b> |            |                       |           |                  |           |
| Source Type                  | ESI        | Ion Polarity          | Positive  | Set Nebulizer    | 0.3 Bar   |
| Focus                        | Not active | Set Capillary         | 4500 V    | Set Dry Heater   | 180 °C    |
| Scan Begin                   | 50 m/z     | Set End Plate Offset  | -500 V    | Set Dry Gas      | 4.0 l/min |
| Scan End                     | 1500 m/z   | Set Collision Cell RF | 100.0 Vpp | Set Divert Valve | Source    |

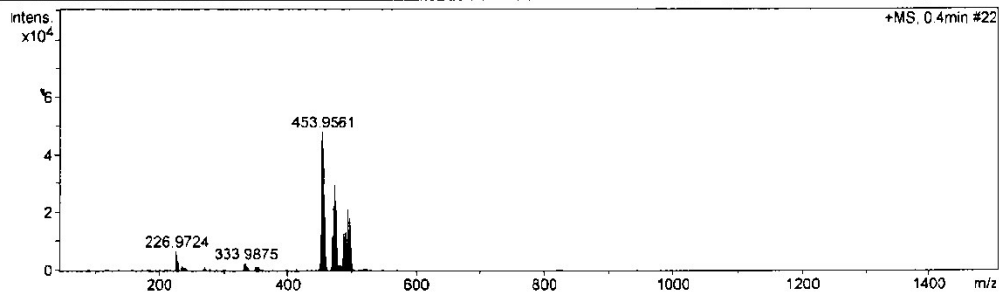

| Meas. m/z | # | Formula             | Score  | m/z      | err [mDa] | err [ppm] | mSigma | rdb  | e <sup>-</sup> Conf | N-Rule |
|-----------|---|---------------------|--------|----------|-----------|-----------|--------|------|---------------------|--------|
| 453.9561  | 1 | C 19 H 18 Fe N Pd S | 100.00 | 453.9548 | -1.3      | -3.0      | 7.5    | 11.5 | even                | ok     |

**Fig S3** Mass spectrum of complex 1

## Mass Spectrum SmartFormula Report

**Analysis Info**

Analysis Name D:\Data\JULY\_2012\4A.d  
 Method tune\_low.m  
 Sample Name  
 Comment

Acquisition Date 8/3/2012 11:48:36 AM  
 Operator Sharma/Singh  
 Instrument / Ser# micrOTOF-Q II 10262

**Acquisition Parameter**

|             |            |                       |           |                  |           |
|-------------|------------|-----------------------|-----------|------------------|-----------|
| Source Type | ESI        | Ion Polarity          | Positive  | Set Nebulizer    | 0.3 Bar   |
| Focus       | Not active | Set Capillary         | 4500 V    | Set Dry Heater   | 180 °C    |
| Scan Begin  | 50 m/z     | Set End Plate Offset  | -500 V    | Set Dry Gas      | 4.0 l/min |
| Scan End    | 1500 m/z   | Set Collision Cell RF | 100.0 Vpp | Set Divert Valve | Source    |

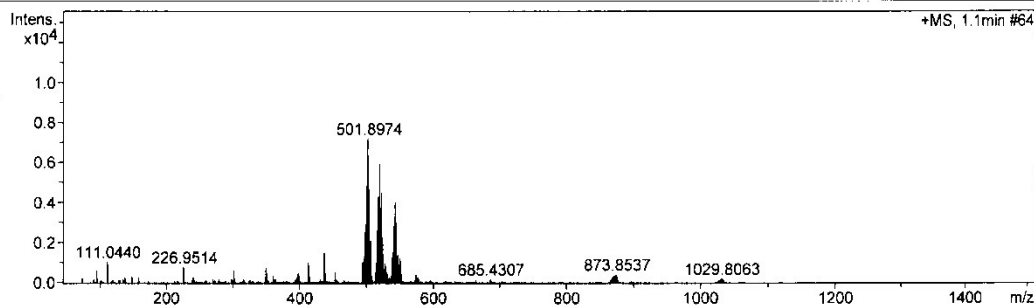

| Meas. m/z | # | Formula                                               | Score  | m/z      | err [mDa] | err [ppm] | mSigma | rdb  | e <sup>-</sup> Conf | N-Rule |
|-----------|---|-------------------------------------------------------|--------|----------|-----------|-----------|--------|------|---------------------|--------|
| 501.8974  | 1 | C <sub>19</sub> H <sub>18</sub> FeN <sub>2</sub> PdSe | 100.00 | 501.8997 | 2.3       | 4.6       | 13.2   | 11.5 | even                | ok     |

Fig S4 Mass spectrum of complex 2

## Mass Spectrum SmartFormula Report

**Analysis Info**

Analysis Name Z:\MAR 2016\AP1.d  
 Method tune\_wide.m  
 Sample Name TM1:100  
 Comment

Acquisition Date 3/4/2016 10:21:28 AM  
 Operator IITD  
 Instrument micrOTOF-Q II 228888.10262

**Acquisition Parameter**

|             |          |                       |           |                  |           |
|-------------|----------|-----------------------|-----------|------------------|-----------|
| Source Type | ESI      | Ion Polarity          | Positive  | Set Nebulizer    | 0.3 Bar   |
| Focus       | Active   | Set Capillary         | 4500 V    | Set Dry Heater   | 180 °C    |
| Scan Begin  | 50 m/z   | Set End Plate Offset  | -500 V    | Set Dry Gas      | 4.0 l/min |
| Scan End    | 3000 m/z | Set Collision Cell RF | 500.0 Vpp | Set Divert Valve | Source    |

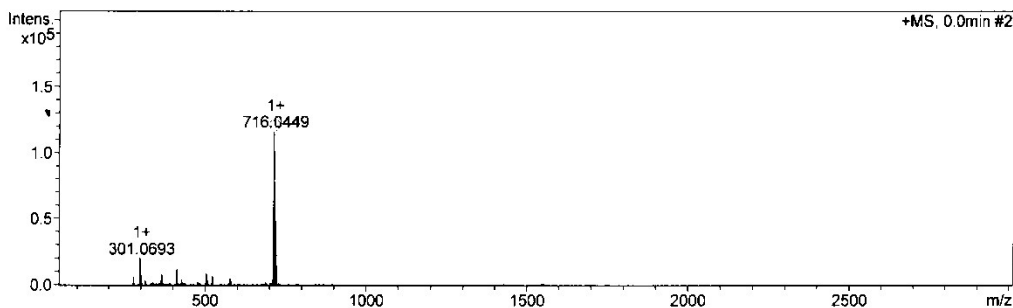

| Meas. m/z  | # | Ion                                                  | Formula    | m/z        | err [ppm] | Mean err [ppm] | rdb  | N-Rule | e <sup>-</sup> Conf | mSigma | Std I a | Std Mean m/z | Std VarNo | Std I rm | Std m/z | Std Comb Diff | Std Dev |
|------------|---|------------------------------------------------------|------------|------------|-----------|----------------|------|--------|---------------------|--------|---------|--------------|-----------|----------|---------|---------------|---------|
| 716.044888 | 1 | C <sub>37</sub> H <sub>33</sub> FeN <sub>2</sub> PdS | 716.046531 | 716.046531 | 0.2       | 4.3            | 22.5 | ok     | even                | 55.3   | 33.3    | 3.5          | 6.2       | 2.3      | 842.7   |               |         |

Fig S5 Mass spectrum of complex 3

## NMR spectra-

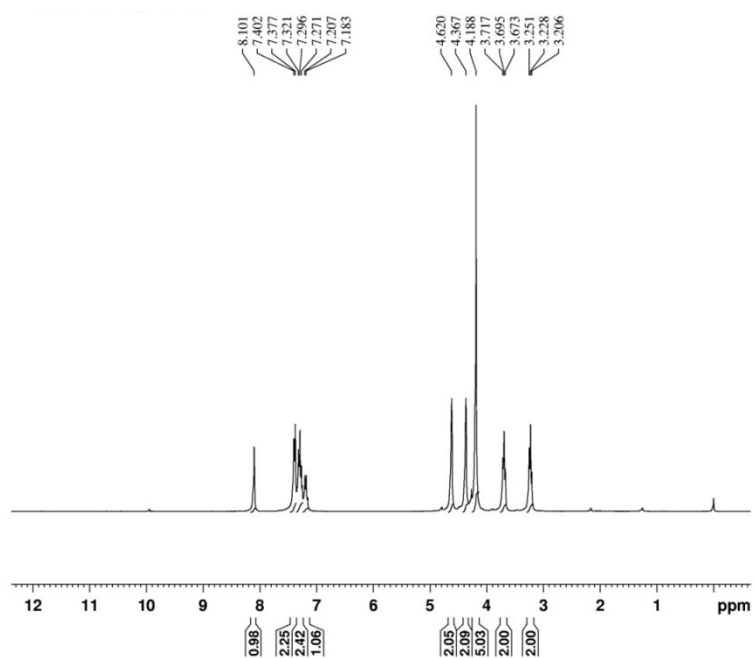

FigureS6 <sup>1</sup>H NMR spectrum of ligand L1

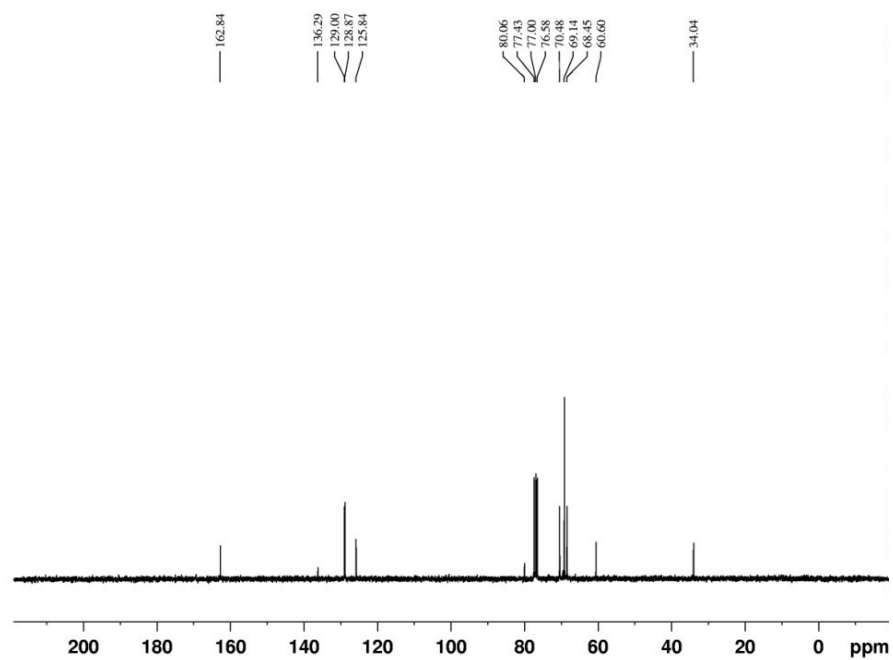

FigureS7 <sup>13</sup>C{<sup>1</sup>H} NMR spectrum of ligand L1



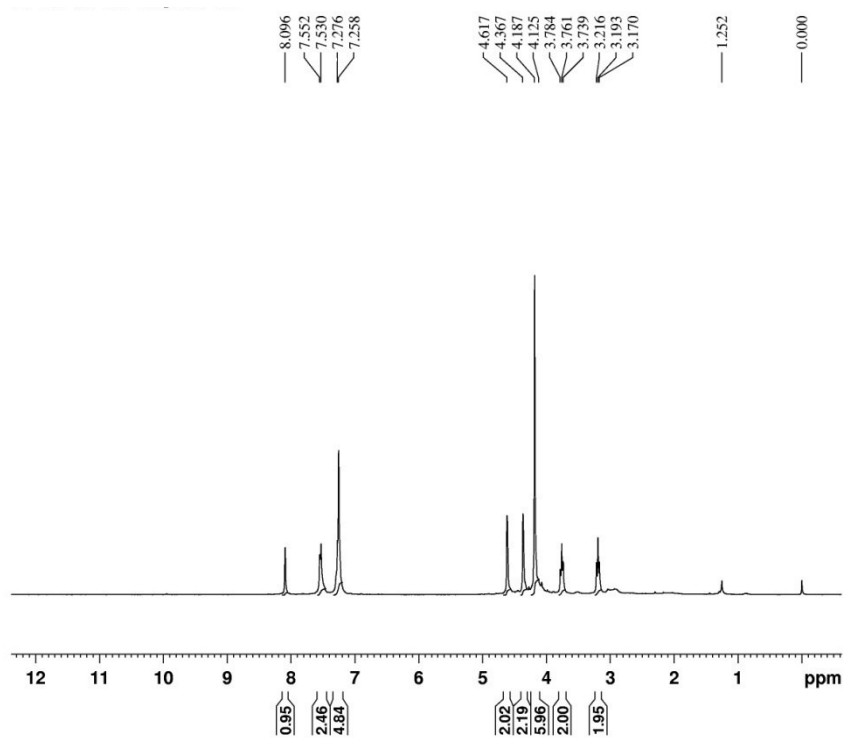

**FigureS8**  $^1\text{H}$  NMR spectrum of ligand **L2**

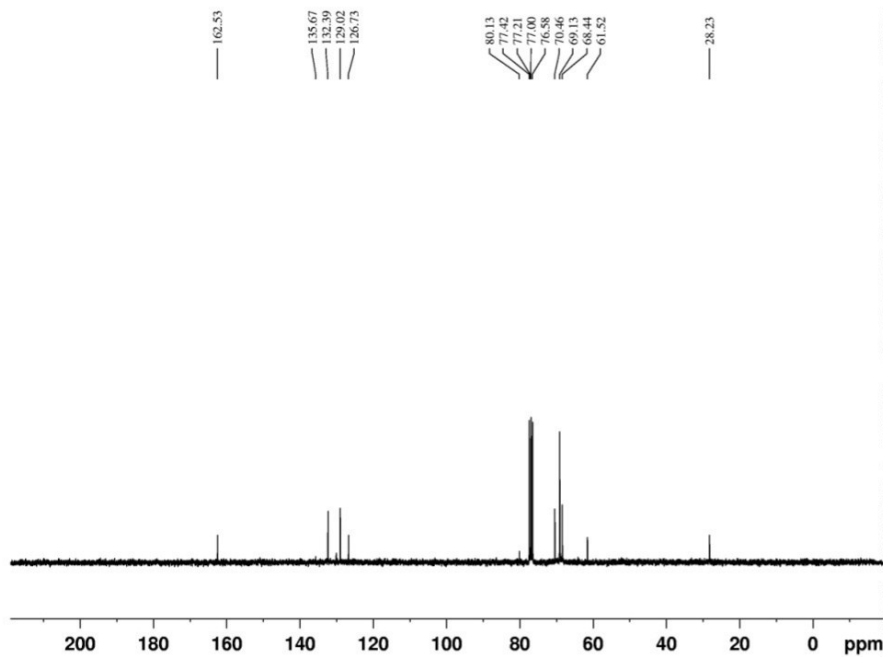

**FigureS9**  $^{13}\text{C}\{^1\text{H}\}$  NMR spectrum of ligand **L2**

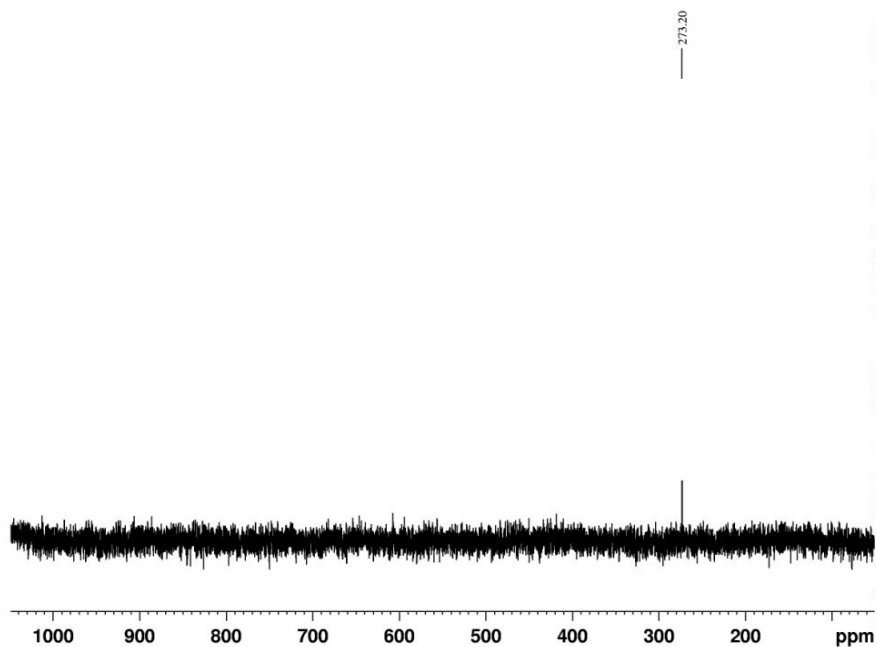

**FigureS10** <sup>77</sup>Se{<sup>1</sup>H} NMR spectrum of ligand L2

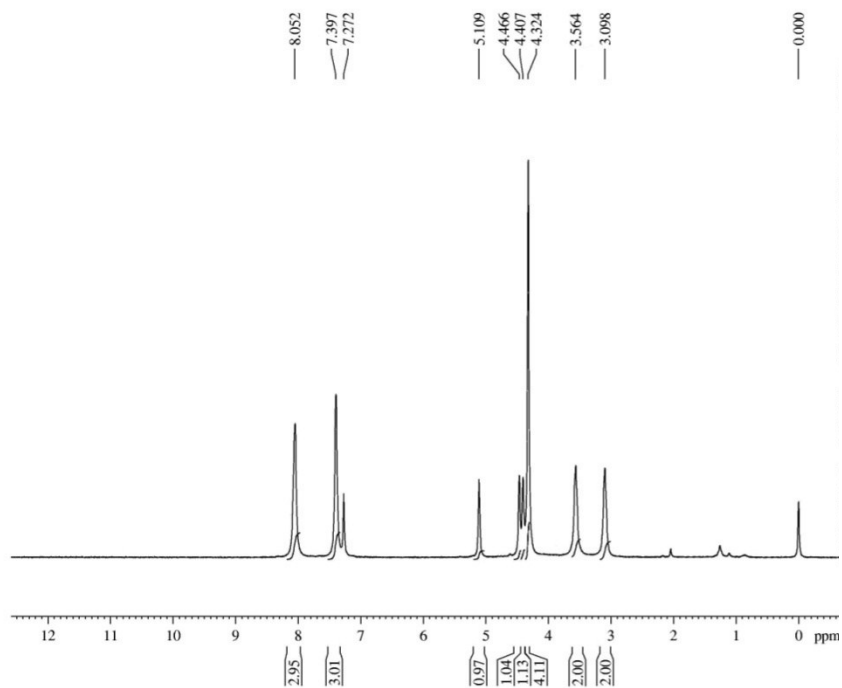

**FigureS11** <sup>1</sup>H NMR spectrum of **1**

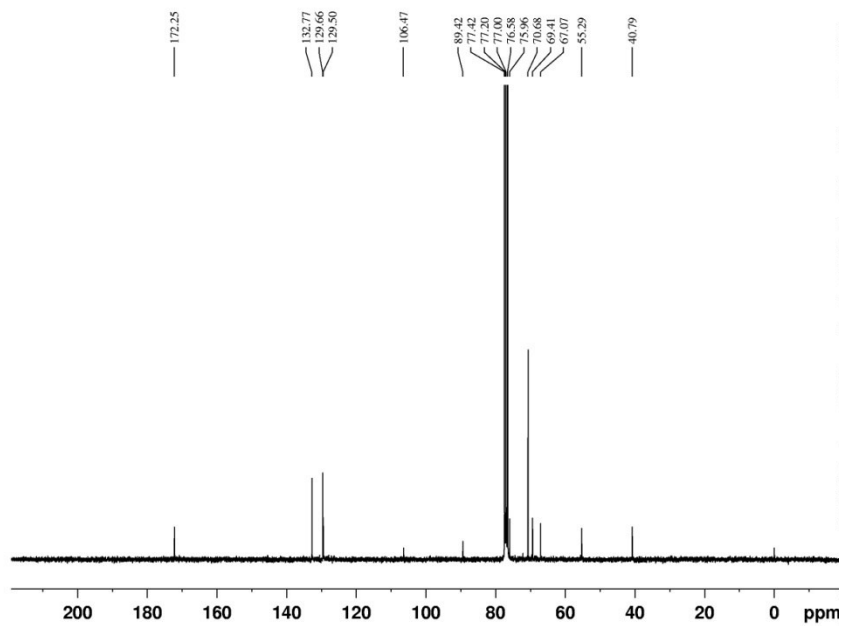

**FigureS12**  $^{13}\text{C}\{^1\text{H}\}$  NMR spectrum of **1**

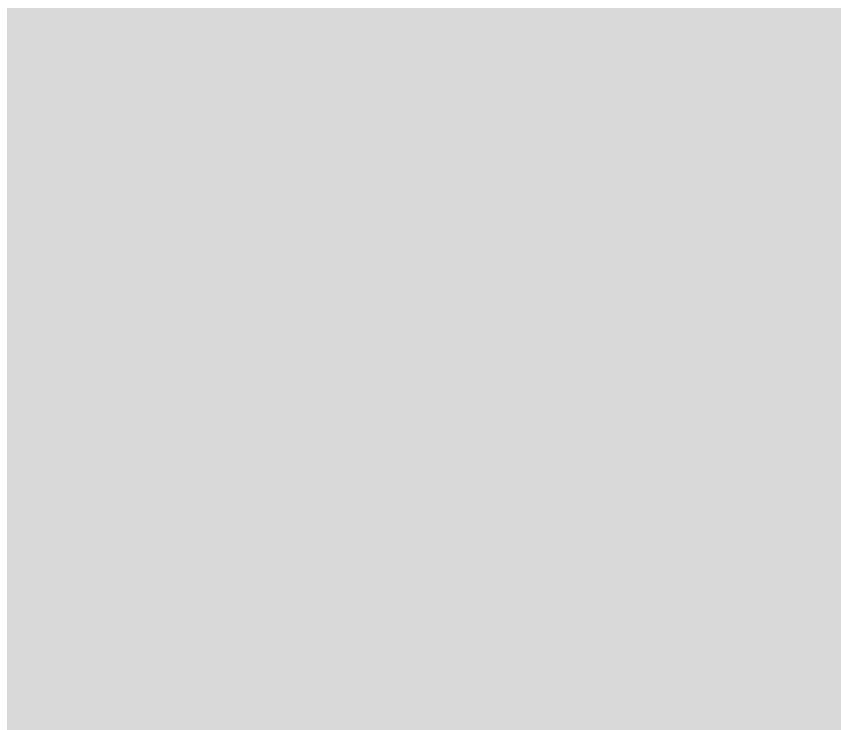

**FigureS13**  $^1\text{H}$  NMR spectrum of **2**

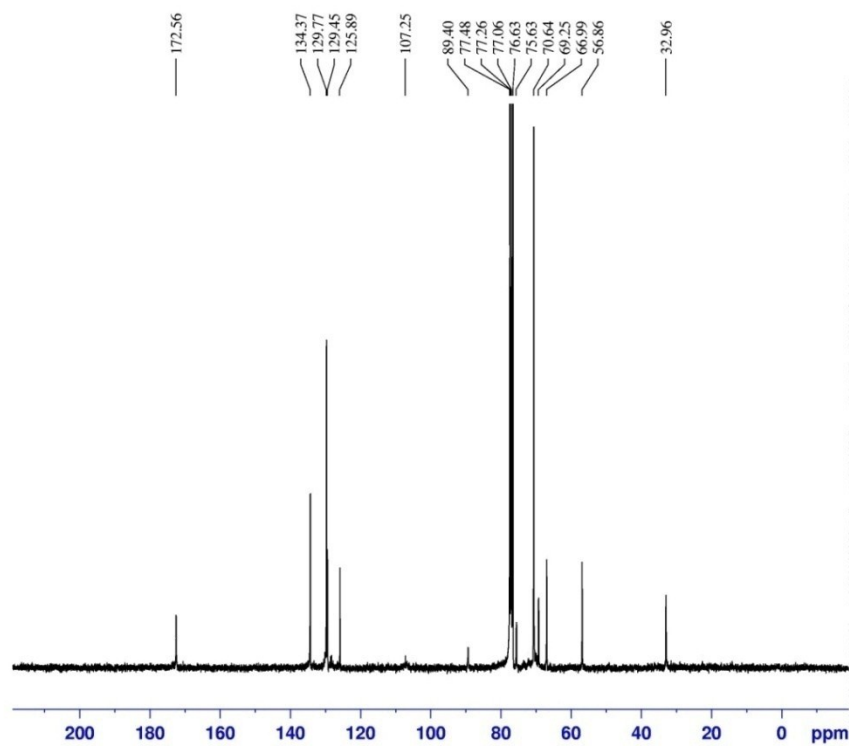

FigureS14  $^{13}\text{C}\{^1\text{H}\}$  NMR spectrum of **2**

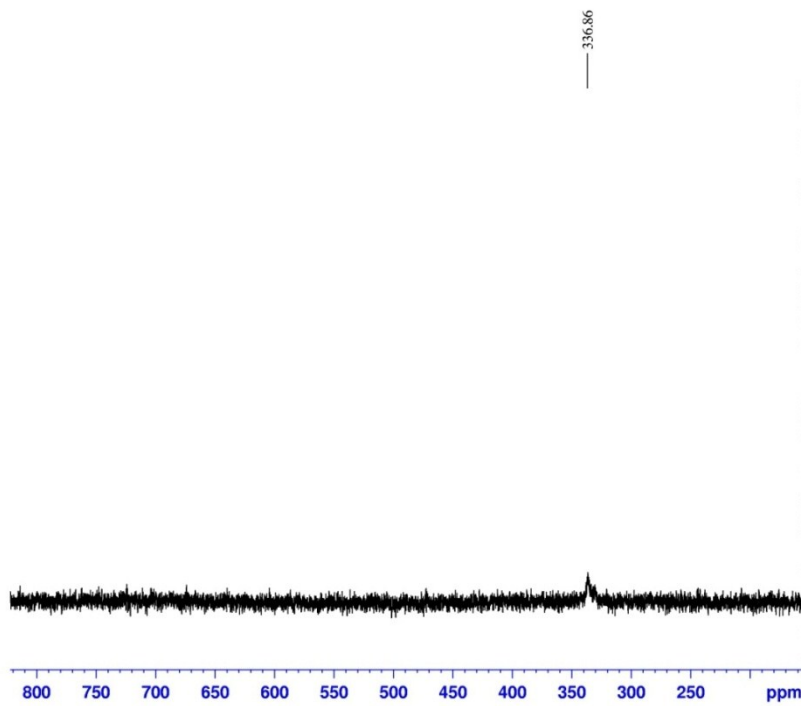

FigureS15  $^{77}\text{Se}\{^1\text{H}\}$  NMR spectrum of **2**

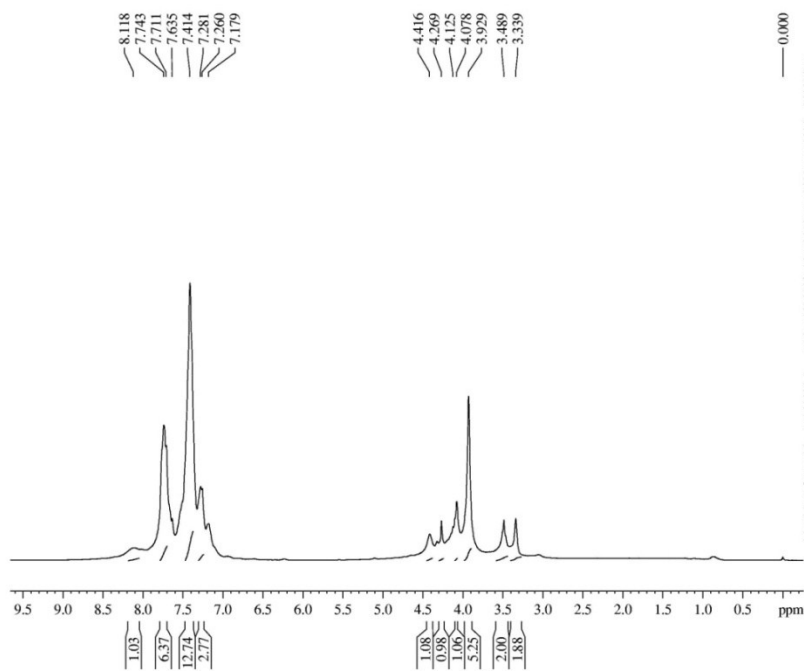

**FigureS16**  $^1\text{H}$  NMR spectrum of **3**

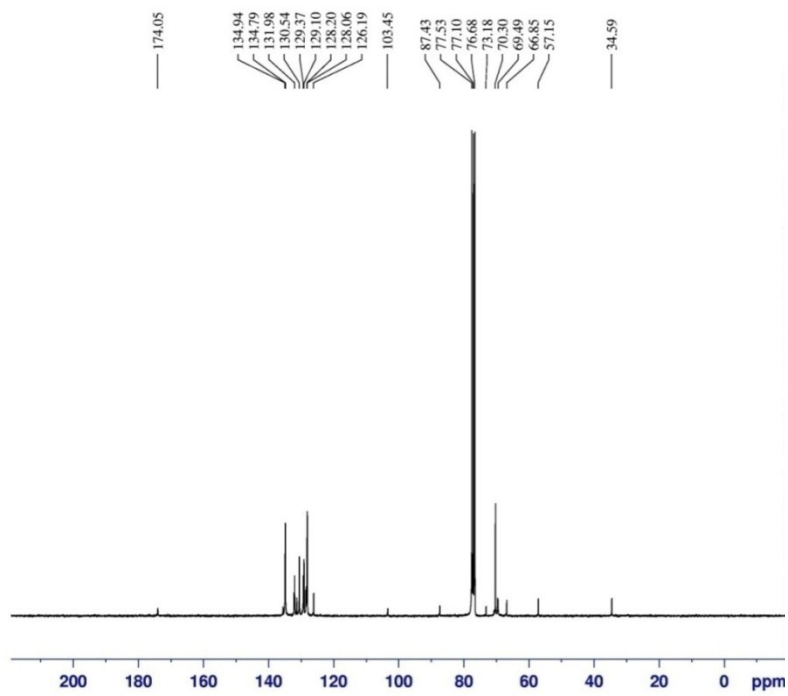

**FigureS17**  $^{13}\text{C}\{^1\text{H}\}$  NMR spectrum of **3**

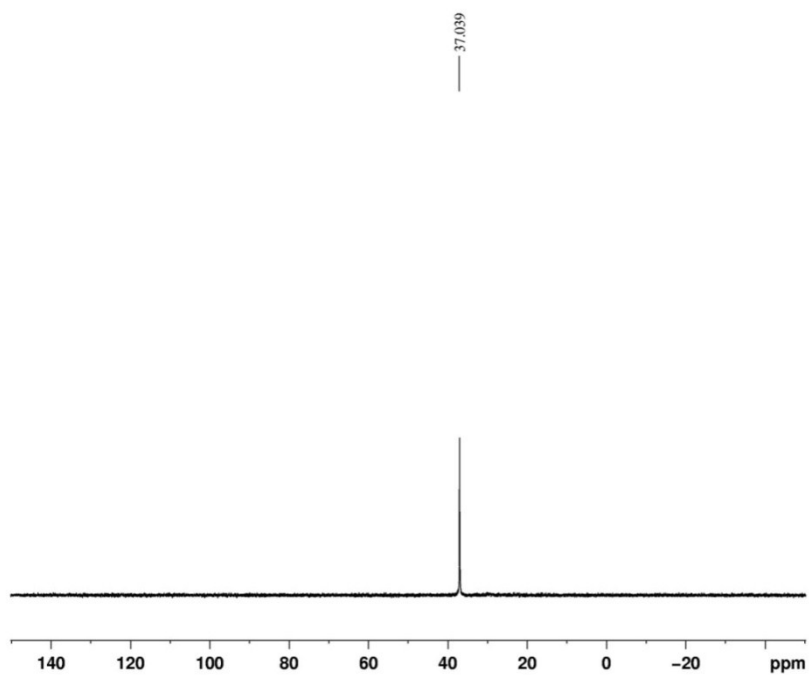

**FigureS18**  $^{31}\text{P}\{^1\text{H}\}$  NMR spectrum of **3**

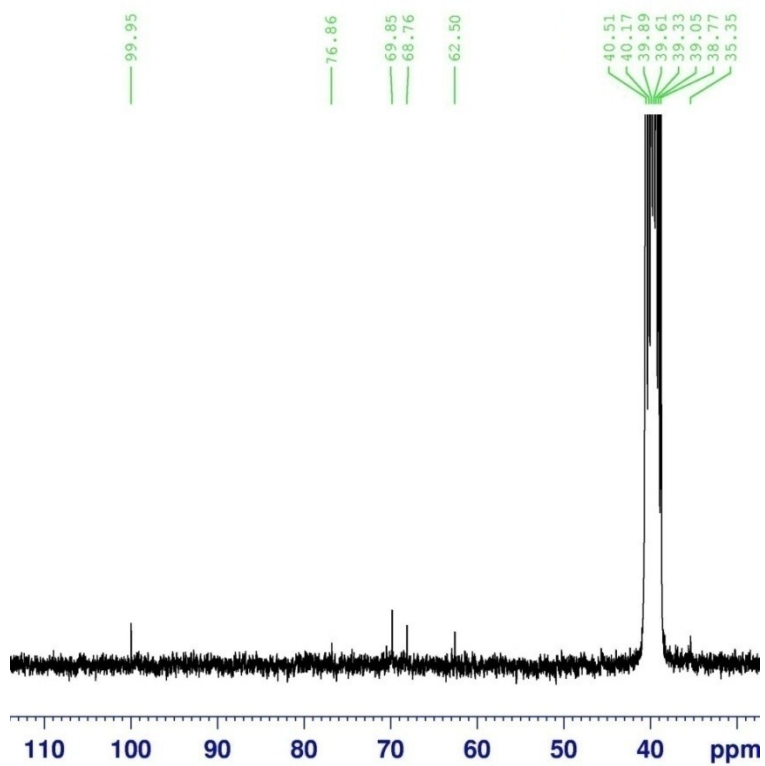

**FigureS19**  $^{13}\text{C}\{^1\text{H}\}$  NMR spectrum of catalysis reaction mixture (C-O coupling)

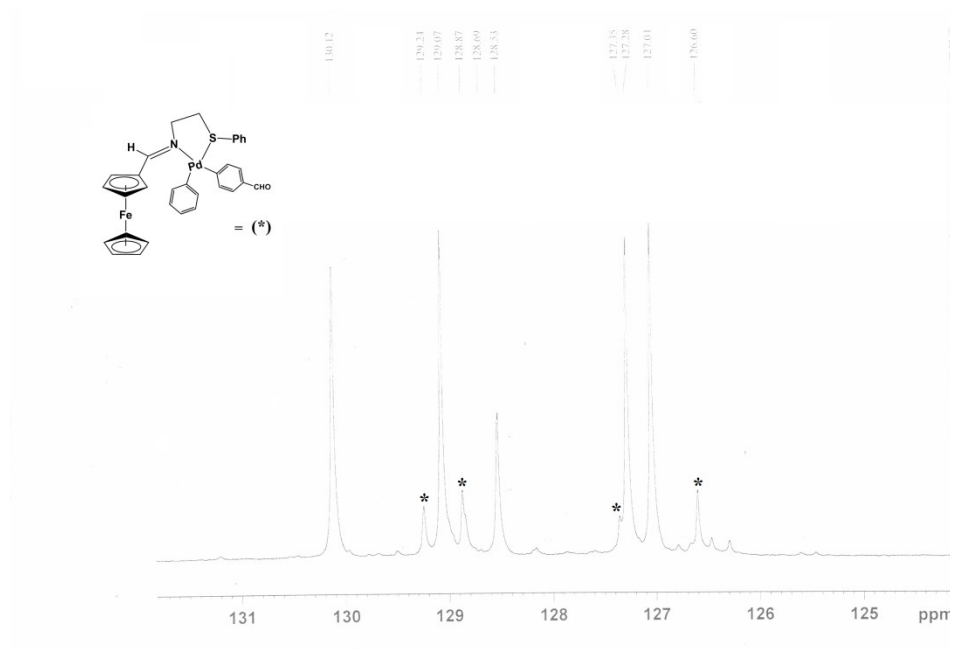

**FigureS20**  $^{13}\text{C}\{^1\text{H}\}$  NMR spectrum of catalysis reaction mixture (C-C coupling)

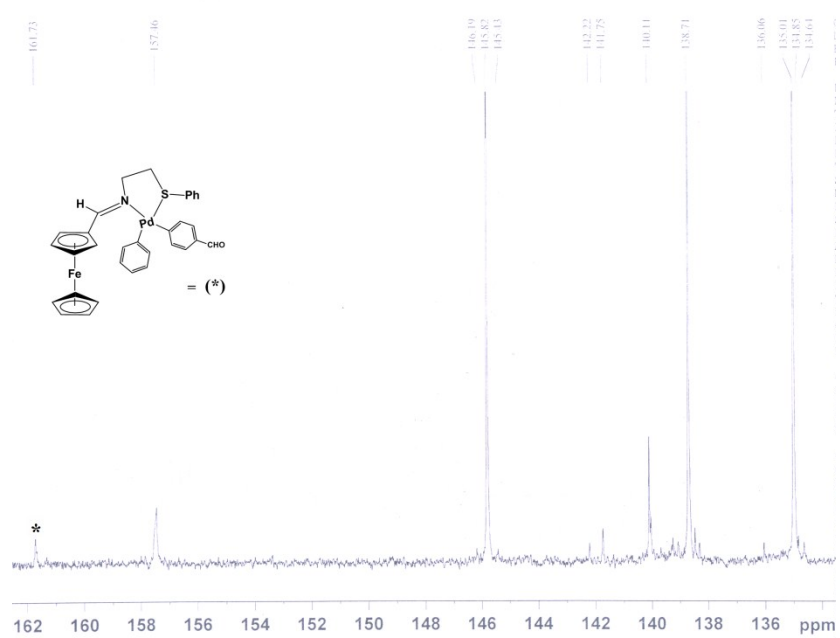

**FigureS21**  $^{13}\text{C}\{^1\text{H}\}$  NMR spectrum of catalysis reaction mixture (C-C coupling)

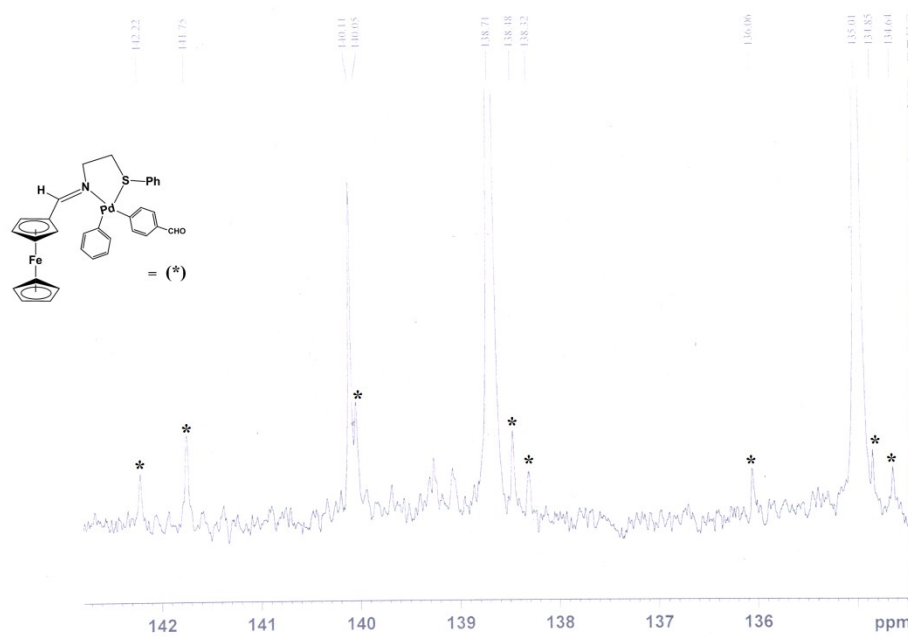

**FigureS22**  $^{13}\text{C}\{^1\text{H}\}$  NMR spectrum of catalysis reaction mixture (C-C coupling)

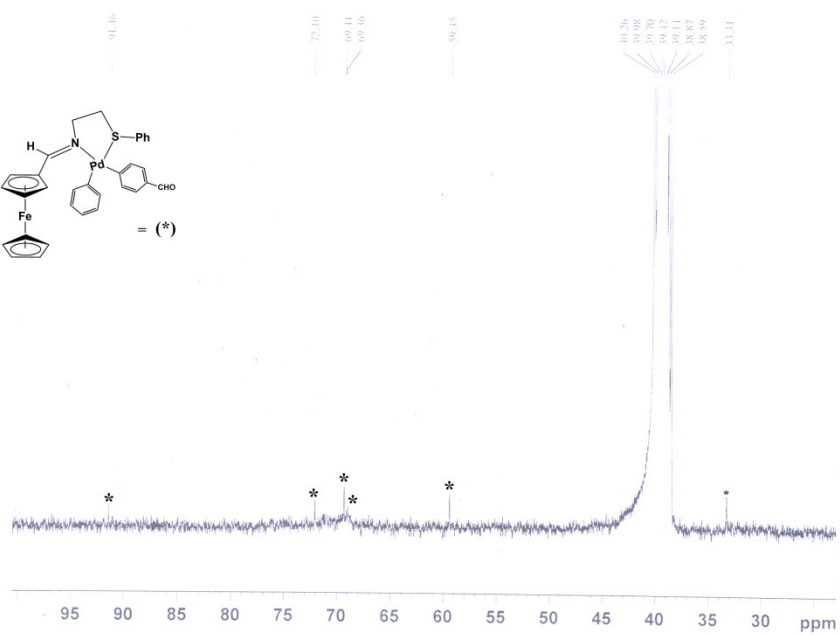

**FigureS23**  $^{13}\text{C}\{^1\text{H}\}$  NMR spectrum of catalysis reaction mixture (C-C coupling)



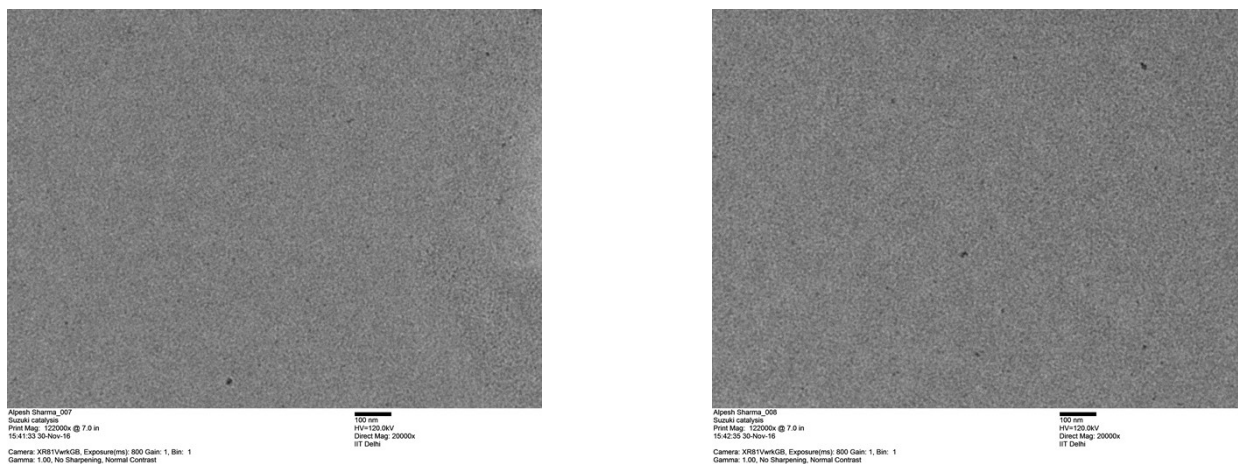

**FigureS24** TEM images of catalysis reaction mixture (a) C-O coupling, (b) Suzuki-Miyaura coupling

#### **NMR Data of products of C-O coupling reaction (3a-3j)-**

**4-phenoxybenzaldehyde (3a):**<sup>1</sup> Yellow liquid. <sup>1</sup>H NMR (300 MHz, CDCl<sub>3</sub>, 25°C vs Me<sub>4</sub>Si):  $\delta$  (ppm): 9.92 (s, 1H), 7.84-7.86 (d, 2H), 7.40-7.45 (t, 2H), 7.20-7.26 (m, 1H), 7.05-7.11 (t, 4H).

**1-(4-phenoxyphenyl)ethanone (3b):**<sup>1</sup> White Solid. <sup>1</sup>H NMR (300 MHz, CDCl<sub>3</sub>, 25°C vs Me<sub>4</sub>Si): 7.91-7.96 (d, 2H), 7.36-7.42 (t, 2H), 7.19-7.22 (t, 1H), 7.06-7.08 (d, 2H), 6.97-7.02 (d, 2H), 2.57 (s, 3H).

**1-Nitro-4-phenoxybenzene (3c):**<sup>2</sup> Yellow Solid. <sup>1</sup>H NMR (300 MHz, CDCl<sub>3</sub>, 25°C vs Me<sub>4</sub>Si): 8.11-8.14 (d, 2H), 7.34-7.40 (t, 2H), 7.16-7.21 (t, 1H), 7.01-7.03 (d, 2H), 6.92-6.95 (d, 2H).

**4-phenoxybenzotrile (3d):**<sup>1</sup> White Solid. <sup>1</sup>H NMR (300 MHz, CDCl<sub>3</sub>, 25°C vs Me<sub>4</sub>Si): 7.49-7.55 (m, 2H), 7.30-7.35 (t, 2H), 7.11-7.17 (t, 1H), 6.96-6.98 (d, 2H), 6.90-6.93 (d, 2H).

**2-phenoxybenzaldehyde (3e):**<sup>1</sup> Yellow liquid. <sup>1</sup>H NMR (300 MHz, CDCl<sub>3</sub>, 25°C vs Me<sub>4</sub>Si): 10.45 (s, 1H), 7.85-7.88 (d, 1H), 7.41-7.47 (t, 1H), 7.30-7.35 (t, 2H), 7.10-7.14 (t, 2H), 6.98-7.01 (d, 2H), 6.81-6.84 (d, 1H).

**1-(2-phenoxyphenyl)ethanone (3f):**<sup>2</sup> Colorless oil. <sup>1</sup>H NMR (300 MHz, CDCl<sub>3</sub>, 25°C vs Me<sub>4</sub>Si): 7.83-7.86 (d, 1H), 7.35-7.45 (m, 3H), 7.15-7.20 (m, 2H), 7.01-7.03 (d, 2H), 6.90-6.92 (d, 2H), 2.64 (s, 3H).

**Diphenyl ether (3g):**<sup>2</sup> Colorless liquid. <sup>1</sup>H NMR (300 MHz, CDCl<sub>3</sub>, 25°C vs Me<sub>4</sub>Si): 7.24-7.28 (t, 4H), 7.02-7.05 (t, 2H), 6.93-6.95 (d, 4H).

**1-Methyl-4-phenoxybenzene(3h):**<sup>2</sup>Colorless liquid. <sup>1</sup>H NMR (300 MHz, CDCl<sub>3</sub>, 25°C vs Me<sub>4</sub>Si): 7.46-7.48 (m, 2H), 7.23-7.26 (t, 2H), 7.06- 7.07 (m, 1H), 6.98-7.04 (m, 2H), 6.89-6.91 (m, 2H), 2.26 (s, 3H).

**1-Methoxy-4-phenoxybenzene(3i):**<sup>1</sup>Colorless liquid. <sup>1</sup>H NMR (300 MHz, CDCl<sub>3</sub>, 25°C vs Me<sub>4</sub>Si): 7.25-7.32 (m, 2H), 7.01-7.06 (t, 1H), 6.93- 7.01 (m, 4H), 6.86-6.90 (m, 2H), 3.81 (s, 3H).

**2-phoxypyridine(3j):**<sup>3</sup> Colorless oil. <sup>1</sup>H NMR (300 MHz, CDCl<sub>3</sub>, 25°C vs Me<sub>4</sub>Si): 8.12-8.13 (m, 1H), 7.58-7.62 (t, 1H), 7.31-7.35 (t, 2H), 7.05-7.18 (m, 3H), 6.90-6.93 (t, 1H), 6.81-6.84 (d, 1H).

#### **NMR Data of products of Suzuki-Miyaura coupling reaction (6a-6i)-**

**4-Phenylbenzaldehyde(6a):**<sup>4</sup> Light yellow solid. <sup>1</sup>H NMR (300 MHz, CDCl<sub>3</sub>, 25°C vs Me<sub>4</sub>Si): δ 10.06 (s, 1H), 7.95 (d, J = 8.4 Hz, 2H), 7.75 (d, J = 8.4 Hz, 2H), 7.63-7.65 (m, 2H), 7.39-7.51 (m, 3H).

**4-Nitrobiphenyl(6b):**<sup>5</sup> Pale yellow solid. <sup>1</sup>H NMR (300 MHz, CDCl<sub>3</sub>, 25°C vs Me<sub>4</sub>Si): δ 8.27 (d, J = 9.0 Hz, 2H), 7.71 (d, J = 9.0 Hz, 2H), 7.61 (d, J = 8.4 Hz, 2H), 7.41-7.51 (m, 3H).

**4-Phenylbenzotrile(6c):**<sup>5</sup> Pale yellow solid. <sup>1</sup>H NMR (300 MHz, CDCl<sub>3</sub>, 25°C vs Me<sub>4</sub>Si): δ 7.54-7.61 (m, 4H), 7.49-7.52 (m, 2H), 7.34-7.45 (m, 3H).

**4-Acetylbiphenyl(6d):**<sup>5</sup> White solid. <sup>1</sup>H NMR (300 MHz, CDCl<sub>3</sub>, 25°C vs Me<sub>4</sub>Si): 8.02 (d, J = 8.4 Hz, 2H), 7.60-7.68 (m, 4H), 7.38-7.48 (m, 3H), δ 2.62 (s, 3H).

**Biphenyl(6e):**<sup>5</sup> White solid: <sup>1</sup>H NMR (300 MHz, CDCl<sub>3</sub>, 25°C vs Me<sub>4</sub>Si): 7.58 (d, J = 6.9 Hz, 4H), 7.42 (t, J = 7.5 Hz, 4H), δ 7.33 (t, J = 7.5 Hz, 2H).

**Biphenyl-4-carboxylic acid(6f):**<sup>6</sup> White solid. <sup>1</sup>H NMR (300 MHz, DMSO, 25°C vs Me<sub>4</sub>Si): δ, 8.03 (d, J = 8.4 Hz, 2H), 7.79 (d, J = 8.4 Hz, 2H), 7.73 (d, J = 6.9 Hz, 2H), 7.39-7.52 (m, 3H).

**4-Phenylpyridine (6g):**<sup>7</sup>Brown solid. <sup>1</sup>H NMR (300 MHz, CDCl<sub>3</sub>, 25°C vs Me<sub>4</sub>Si): 8.65 (d, J = 5.4 Hz, 2H), 7.62 (d, J = 8.1 Hz, 2 H), δ 7.40-7.50 (m, 5H).

**4-Methylbiphenyl (6h):**<sup>5</sup> Colorless solid. <sup>1</sup>H NMR (300 MHz, CDCl<sub>3</sub>, 25°C vs Me<sub>4</sub>Si): 7.55-7.58 (m, 2H), 7.48 (d, J = 8.1 Hz, 2H), 7.38-7.42 (m, 2H), 7.27-7.32 (m, 1H), 7.23 (d, J = 7.8 Hz, 2H), δ 2.37 (s, 3H).

**4-Methoxybiphenyl (6i):**<sup>5</sup> White solid. <sup>1</sup>H NMR (300 MHz, CDCl<sub>3</sub>, 25°C vs Me<sub>4</sub>Si): 7.50-7.55 (m, 4H), 7.40 (t, J = 7.2 Hz, 2H), 7.28-7.31 (m, 1H), 6.96 (d, J = 8.4 Hz, 2H), δ 3.82 (s, 3H).

## References

1. T. Hu, T. Schulz, C. Torborg, X. Chen, J. Wang, M. Beller, J. Huang, *Chem. Commun.*, 2009, 7330.
2. Q. Zhang, D. Wang, X. Wang, K. Ding, *J.Org.Chem.*, 2009, **74**, 7187.
3. V. Engels, F. Benaskar, N. Patil, E. V. Rebrov, V. Hessel, L. A. Hulshof, D. A. Jefferson, J. A. J. M. Vekemans, S. Karwal, J. C. Schouten, A. E. H. Wheatley, *Organic Process Research & Development*, 2010, **14**, 644.
4. , R. K. Arvela, N. E. Leadbeater, *Org. Lett.* 2005, **7**, 2101.
5. B.Tao,D. W. Boykin, *J.Org. Chem.* 2004, **69**, 4330.
6. G. M. Scheuermann, L. Rumi,P.Steurer,W. Bannwarth, R.Mulhaupt, *J. Am. Chem. Soc.* 2009, **131**, 8262.
7. B.,V.Martinez, A. G. de Viedma, C.Burgos, B. J. Alvarez, *Org. Lett.*, 2000, **2**, 3933.
